# Supplementary material for: Anti-ROR1 CAR-T cells: Architecture and performance
Source: PubMed Central journal article supplement (PMC9981679; doi:10.3389/fmed.2023.1121020), 2023-02-17
Supplement: Table_1.pdf [file Table_1.pdf]

**Supplementary Table 1.** List of CAR-T cells developed against ROR1.

| <b>Gene Delivery Method</b> | <b>scFv</b> | <b>mAb Host</b> | <b>Recognition on ROR1</b> | <b>Co-stimulatory Domains</b> | <b>Reference</b> |
|-----------------------------|-------------|-----------------|----------------------------|-------------------------------|------------------|
| LVs                         | 2A2         | Mouse           | Ig-Like/Frizzled           | CD28 or 4-1BB                 | (53,103)         |
|                             | R12         | Rabbit          | Ig-Like/Frizzled           | CD28 or 4-1BB                 | (53)             |
|                             | XBR1-402    | Rabbit          | Ig-Like/Frizzled           | 4-1BB                         | (104)            |
|                             | Clone F     | Rabbit          | Ig-Like/Frizzled           | CD28 or 4-1BB                 | (105)            |
|                             | UC-961      | Mouse           | Ig-Like/Frizzled           | 4-1BB                         | (106)            |
|                             | R11         | Rabbit          | Frizzled                   | 4-1BB                         | (108)            |
| SB                          | 4A5         | Mouse           | Ig-like                    | CD28 or 4-1BB                 | (107)            |
|                             | 2A2         | Mouse           | Ig-Like/Frizzled           | 4-1BB                         | (122)            |
